# Supplementary material for: Characterization of the Immune Cell Infiltration Landscape in Head and Neck Squamous Cell Carcinoma to Aid Immunotherapy
Source: PubMed Central journal article supplement — Mol Ther Nucleic Acids. 2020 Aug 29;22:298–309. doi: 10.1016/j.omtn.2020.08.030 (PMC7522342; doi:10.1016/j.omtn.2020.08.030), 2020-08-29
Supplement: mmc1.pdf [file mmc1.pdf]

**OMTN, Volume 22**

**Supplemental Information**

**Characterization of the Immune Cell**

**Infiltration Landscape in Head and Neck**

**Squamous Cell Carcinoma to Aid Immunotherapy**

**Xinhai Zhang, Mengqi Shi, Tielou Chen, and Boxin Zhang**

**Characterization of the immune cell infiltration landscape in head and neck  
squamous cell carcinoma to aid immunotherapy**

Xinhai Zhang<sup>2</sup>, Tielou Chen<sup>2</sup> and Boxin Zhang<sup>1</sup>

<sup>1</sup> Department of Stomatology, Changzheng hospital, Second military Medical University, Shanghai 200003, China

<sup>2</sup> Oral Research Center of CPLA, Changhai hospital, Second military Medical University, 15 Dongjiangwan Road, Shanghai 200081, China

Correspondence should be addressed to Boxin. Zhang ([s441566391@163.com](mailto:s441566391@163.com))

\* Corresponding author: Boxin. Zhang, Department of Stomatology, Changzheng hospital, Second military Medical University, Shanghai 200003, China

E-mail: [s441566391@163.com](mailto:s441566391@163.com)

TEL: 86-21-56715915

**Figure S1. Overview of study design and consensus matrixes of all HNSC samples**

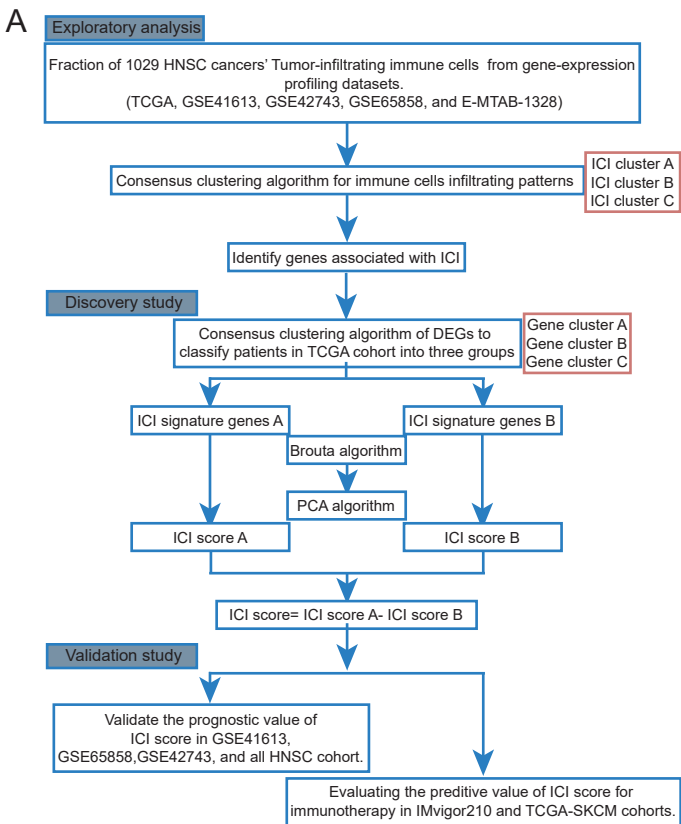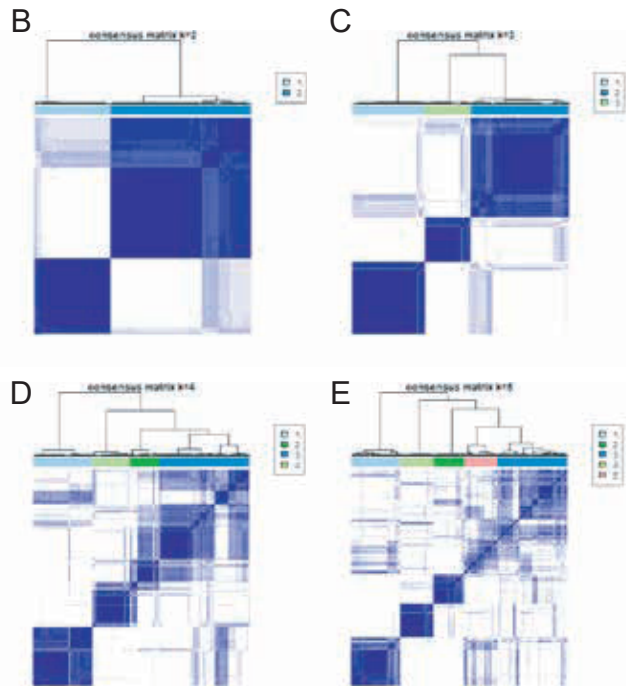

**A.** Overview of study design. **B.** Consensus matrixes of all HNSC samples for each  $k$  ( $k = 2-5$ ), displaying the clustering stability using 1000 iterations of hierarchical clustering.

# Figure S2. Consensus clustering of TME cell infiltration in the ACRG cohort and DEGs among the ICI phenotypes

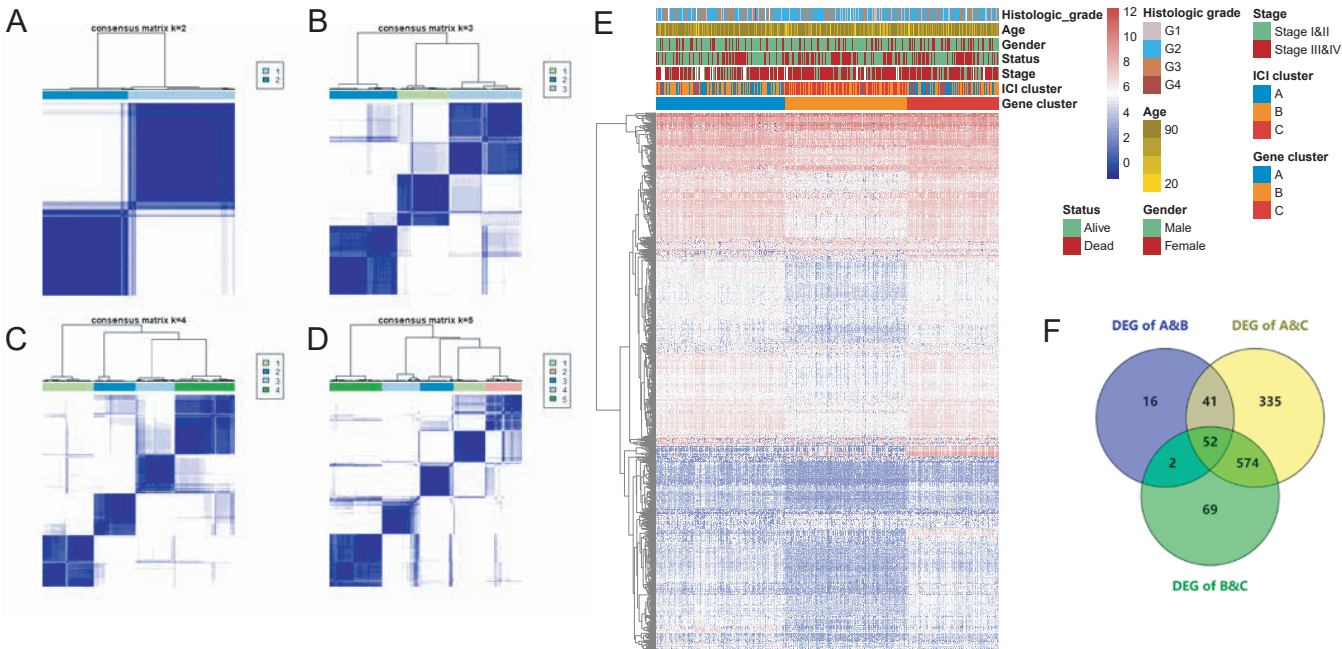

**A-D.** Consensus matrixes of TCGA-HNSC cohorts for each  $k$  ( $k = 2-5$ ), displaying the clustering stability using 1000 iterations of hierarchical clustering. **E.** Unsupervised clustering of 1089 DEGs among three ICI cluster groups to classify patients in TCGA-HNSC into three groups. **F.** Venn diagram illustrating the number of DEGs among the three ICI clusters.

**Figure S3. Prognostic value of ICI scores in HNSC cohorts.**

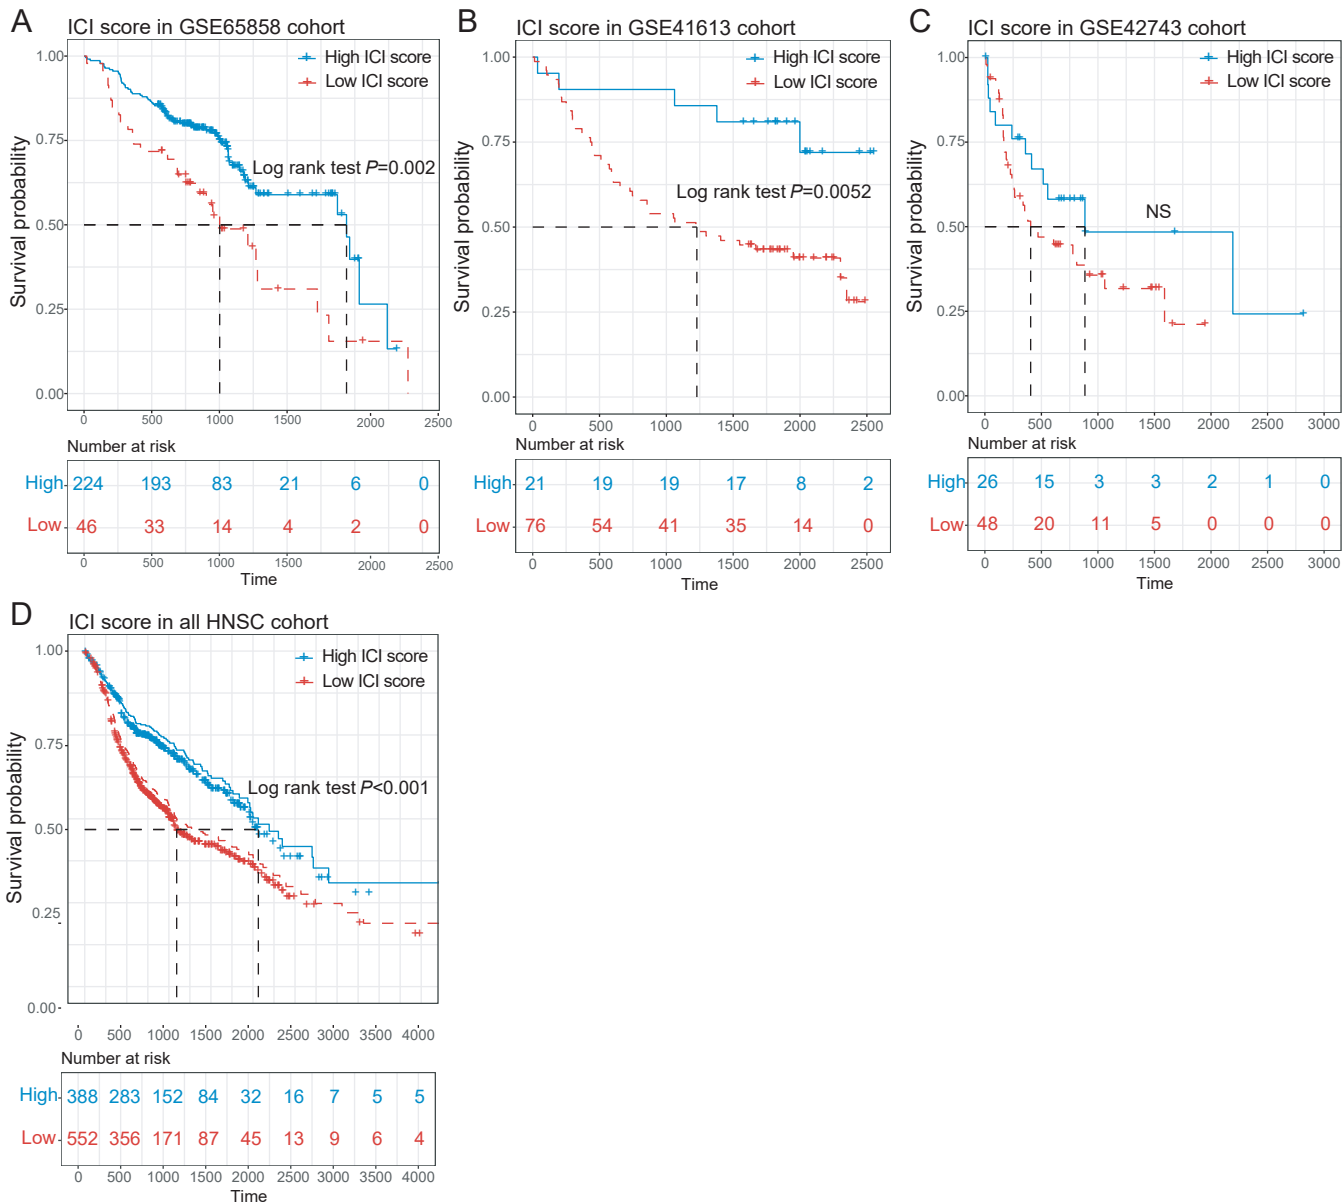

**A.** Kaplan–Meier curves for patients with high and low ICI scores in the GSE65858 cohort. Log-rank test  $P=0.002$ . **B.** Kaplan–Meier curves for patients with high and low ICI scores in the GSE41613 cohort. Log-rank test  $P=0.0052$ . **C.** Kaplan–Meier curves for patients with high and low ICI scores in the GSE42743 cohort. **D.** Kaplan–Meier curves for patients with high and low ICI scores in the all HNSC cohort. Log-rank test  $P<0.0001$ .
